# Supplementary material
Source: HighWire-hosted journal article supplement (https://www.ez-admanager.com/content/suppl/2018/06/28/WNL.0000000000004487)
Supplement: weber_kruger_1545.pdf [file weber_kruger_1545.pdf]

# Relevancia de la taquicardia supraventricular no sostenida detectada luego de una isquemia cerebral

Mark Weber-Krüger, MD  
Constanze Lutz, MD  
Antonia Zapf, MD  
Raoul Stahrenberg, MD  
Joachim Seegers, MD  
Janin Witzhausen, MD  
Katrin Wasser, MD  
Gerd Hasenfuß, MD  
Klaus Gröschel, MD\*  
Rolf Wachter, MD\*

Correspondencia y solicitud de  
separatas al Dr. Weber-Krüger:  
mark.weber-krueger@med.uni-  
goettingen.de

## RESUMEN

**Objetivo:** El monitoreo prolongado con ECG luego de un infarto cerebral frecuentemente revela fibrilaciones auriculares paroxísticas (FAP) cortas y taquicardia supraventricular no sostenida (TSVNS). Actualmente se debate la mínima duración requerida de la fibrilación auricular (FA) para inducir cardioembolismo, la relevancia de la TSVNS y si la FAP corta es consecuencia del daño cerebral en sí mismo. Nosotros buscamos estudiar la relevancia de la TSVNS y de la FAP corta detectadas en el Holter ECG prolongado luego de una isquemia cerebral durante un seguimiento a largo plazo.

**Métodos:** El análisis es del ensayo prospectivo Find-AF (ISRCTN46104198). Incluimos pacientes con isquemia cerebral aguda. Aquellos sin FA al ingreso realizaron un monitoreo con Holter ECG de 7 días. Diferenciamos pacientes con FA en la admisión (FA-adm), con FAP (> 30 segundos), con TSVNS (> 5 latidos, pero < 30 segundos en un intervalo de ECG de 24 horas), y sin TSVNS (controles). Durante el seguimiento, aquellos con FAP basal recibieron otro ECG Holter de 7 días para examinar la persistencia de la FA.

**Resultados:** Un total de 254 de 281 pacientes inicialmente incluidos fueron analizados (edad media 70.0 años, 45,3% mujeres). Cuarenta y tres (16,9%) tuvieron FA-adm. Un total de 211 realizaron un monitoreo con Holter ECG de 7 días: 27 (12,8%) tuvieron FAP, 67 (31,8%) tuvieron TSVNS y 117 (55,5%) fueron controles. Durante una media de 3.7 años de seguimiento, el grupo de TSVNS tuvo más infartos cerebrales recurrentes ( $p = 0,04$ ) y mostró numéricamente más FA nuevas (12% vs 5%,  $p = 0,09$ ) que los controles. El 75% de los pacientes con FAP manifiesta detectada luego de la isquemia cerebral todavía tenía FA durante el seguimiento (50% paroxística, 50% persistente/permanente).

**Conclusiones:** Los pacientes con isquemia cerebral y TSVNS tuvieron más infartos recurrentes y numéricamente más FA nuevas durante el seguimiento y podrían beneficiarse de un monitoreo prolongado con ECG. La FAP detectada luego del infarto cerebral no es un fenómeno temporal. *Neurology*® 2017;89:1545–1552

## GLOSARIO

**FA** = fibrilación auricular; **FAP** = fibrilación auricular paroxística; **HR** = *hazard ratio* (razón de riesgo); **IC** = intervalo de confianza; **IVAI** = índice de volumen de la aurícula izquierda; **NIHSS** = Escala de Infarto Cerebral del NIH; **RIC** = rango intercuartil; **TSVNS** = taquicardia supraventricular no sostenida; **TOAST** = *Trial of Org 10172 in Acute Stroke Treatment*.

La fibrilación auricular (FA) es una causa frecuente de infartos cerebrales isquémicos cardioembólicos.<sup>1</sup> El monitoreo con ECG continuo frecuentemente revela episodios cortos de FA paroxística (FAP)<sup>2,3</sup> como también de taquicardia auricular de < 30 segundos, también llamada taquicardia supraventricular no sostenida (TSVNS).<sup>4-7</sup> Aunque las guías actuales de FA requieren que la FAP dure  $\geq 30$  segundos,<sup>8</sup> este punto de corte está basado en un consenso de expertos más que en una evidencia clara, y la duración mínima de un episodio para que lleve a la formación de un trombo es desconocida. Hay alguna evidencia de que la taquicardia auricular > 6 minutos (detectada por un marcapasos implantado o dispositivos de cardioversión/desfibrilación) está asociada con más eventos tromboembólicos,<sup>9</sup> pero muchos de los eventos tromboembólicos documentados no tienen relación temporal con los episodios de FA detectados.<sup>10</sup> No se sabe si los episodios cortos de FA o la TSVNS son capaces de inducir tromboembolismo. Como consecuencia, una búsqueda reciente entre los especialistas en infarto cerebral mostró que no hay un consenso común sobre qué duración mínima debe tener una taquiarritmia detectada luego de un infarto cerebral para iniciar la anticoagulación.<sup>11</sup>

Editorial en página 7

Datos suplementarios en  
[Neurology.org](http://Neurology.org)

\*Estos autores contribuyeron de igual forma al trabajo.

De la Clinic for Cardiology and Pneumology (M.W.-K., C.L., G.H., R.W.), Department of Medical Statistics (A.Z.), and Clinic for Neurology (J.W., K.W.), University of Göttingen; Clinic for Medicine I (R.S.), Helios Albert-Schweitzer-Klinik en Northeim; Clinic and Polyclinic for Medicine II (J.S.), University of Regensburg; Clinic and Polyclinic for Neurology (K.G.), University Medical Center of the Johannes Gutenberg-University Mainz; y Clinic and Polyclinic for Cardiology (R.W.), University of Leipzig, Germany.

Ir a [Neurology.org](http://Neurology.org) para declaraciones de intereses completas. La información sobre fondos y aquellas declaraciones relevantes para los autores, si existiesen, se encuentran al final del artículo.

Este es un análisis retrospectivo del ensayo prospectivo observacional *Find-AF*, que examinó el rédito de la FAp durante el monitoreo con Holter ECG de 7 días en pacientes con isquemia cerebral aguda (infartos o AIT). Para caracterizar mejor a los pacientes con isquemia cerebral y FAp o TSVNS, primero comparamos las características basales, incluyendo la discapacidad física asociada al infarto cerebral (expresada por el puntaje en la escala de stroke del NIH [NIHSS]). Como se sabe que los infartos cerebrales asociados a FA son más severos que aquellos debidos a macroangiopatía o microangiopatía,<sup>1</sup> la severidad aumentada del infarto cerebral podría actuar como sustituto del cardioembolismo, para aportar algún conocimiento en cuanto a cuál es la duración mínima de una FA para estar asociada a un evento cardioembólico. Más aún, evaluamos los subgrupos de riesgo con infartos cerebrales recurrentes y la mortalidad de todas las causas a lo largo de un período de seguimiento de más de 3 años. Finalmente, quisimos ver si la FAp detectada después de una isquemia cerebral es un fenómeno temporal o persistente, porque hay datos publicados que sugieren que la FA no solo causa infartos cerebrales, sino que también está inversamente desencadenada por lesiones isquémicas, especialmente aquellas que afectan los centros del sistema nervioso autónomo.<sup>12</sup>

**MÉTODOS** **Pacientes, diseño del estudio y datos clínicos.** Se han publicado detalles del ensayo *Find-FA* recientemente.<sup>6</sup> En este ensayo observacional de centro único, se incluyeron prospectivamente pacientes con isquemia cerebral aguda en el *University Hospital of Göttingen*, Alemania, entre marzo de 2009 y febrero de 2010. Se les realizó monitoreo con Holter ECG de 7 días, al menos que tuviesen FA en el ECG de 12 derivaciones al ingreso. El ensayo inicial planeaba seguir a todos los pacientes durante 12 meses; sin embargo, más tarde programamos otra visita de seguimiento luego de 3 años. Si era posible, los pacientes eran vistos personalmente, para adquirir información sobre el curso clínico y la medicación, y para realizar otro ECG de 12 derivaciones. Para aquellos que habían sido inicialmente diagnosticados con FAp en el momento basal, programamos otro Holter ECG de 7 días para determinar la persistencia de la FA. Si los pacientes no aparecían en persona, se adquiría la información por teléfono.

Todos los datos fueron recolectados prospectivamente. Formamos subgrupos de pacientes con FA en el ECG de admisión (FA-adm; conocida o diagnosticada *de novo*), con nueva FAp diagnosticada durante el monitoreo con el Holter ECG de 7 días (FAp), con trastornos del ritmo SV > 5 latidos/24 horas (trastorno del ritmo SV) y sin trastornos del ritmo SV (controles). La explicación detallada para la

subdivisión de los grupos FAp y TSVNS se describe en los datos suplementarios en Neurology.org. La severidad del infarto cerebral se expresó con el puntaje NIHSS. Se utilizó la clasificación *Trial of Org 10172 in Acute Stroke Treatment* (TOAST)<sup>13</sup> para identificar la etiología más probable del evento cerebral isquémico. Esta fue determinada por 2 neurólogos expertos sobre la base de la información clínica recolectada durante la admisión hospitalaria, como también los resultados del monitoreo prolongado con ECG Holter.

**Aprobaciones estándar de protocolo, registros y consentimiento de pacientes.** El *Find-FA* (ISRCTN46104198) cumple con la Declaración de Helsinki y fue aprobado por el comité de ética responsable. Todos los pacientes o sus representantes legales firmaron el consentimiento informado.

**Análisis de Holter ECG y definición de FA(p) y TANS.** Definimos la FA de acuerdo con las guías de FA,<sup>8</sup> por ej., episodios típicos con intervalos RR absolutamente irregulares y sin una onda P discernible de  $\geq 30$  segundos de duración. El *flutter* auricular fue tratado de forma similar a la FA. La taquicardia supraventricular de < 30 segundos, por ej., secuencias de  $\geq 5$  contracciones auriculares prematuras, fue definida como TSVNS. Debido a la pesada carga que implicaba determinar una TSVNS más larga, realizamos un *screening* de solo un intervalo de 24 horas (sin FA), como se describió previamente,<sup>14</sup> mientras que el resto del material de ECG fue específicamente revisado para FA.

**Análisis estadístico.** Todos los análisis fueron realizados con SAS versión 9.4 (SAS Institute Inc., Cary, NC) e IBM SPSS Statistics, versión 23.0 (IBM, Armonk, NY).

Debido a las distribuciones dispares para todas las variables métricas basales, utilizamos la mediana y el rango intercuartil (RIC) como estadística descriptiva y el test de Kruskal-Wallis para comparaciones de grupo. Para variables categóricas basales, las frecuencias absolutas y relativas fueron calculadas y se utilizó el test  $\chi^2$  o exacto de Fisher (cuentas < 5) para comparaciones de grupo.

Utilizamos estimadores de Kaplan-Meier para los puntos finales de muerte, infarto cerebral recurrente, y muerte o infarto cerebral recurrente para probar las probabilidades proporcionales. Para poder formar modelos de regresión Cox para estimar la influencia de los subgrupos en la ocurrencia de estos puntos finales, los subgrupos FA-adm y FAp fueron mezclados, debido a que la presuposición de probabilidades proporcionales no se dio (curvas de Kaplan-Meier superpuestas). Luego testeamos las diferencias entre los grupos formados utilizando el log-rank test. Para los modelos de regresión, primero investigamos todas las variables basales individualmente en modelos de regresión Cox simples. Todas las variables con un valor de  $p < 0,2$  fueron incluidas en modelos de regresión múltiple. Luego realizamos una eliminación hacia atrás, dejando solo las variables con un valor de  $p < 0,05$ .

Debido a que este estudio es retrospectivo y generador de hipótesis, todos los análisis son descriptivos y no confirmatorios, para evitar los tests múltiples, y todos los valores de  $p$  son usados de forma descriptiva.

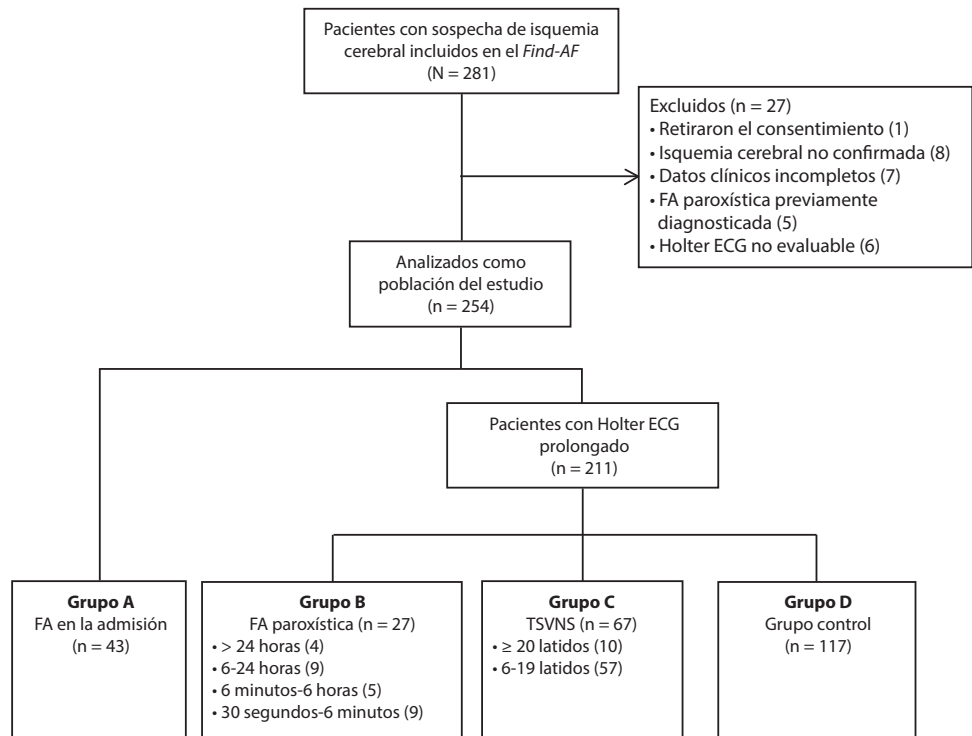

FA = fibrilación auricular; TSVNS = taquicardia supraventricular no sostenida.

**RESULTADOS Población del estudio.** Se incluyeron inicialmente un total de 281 pacientes en el ensayo *Find-AF* (figura 1). Un total de 254 fueron incluidos en el análisis final (27 pacientes tuvieron que ser excluidos debido a las siguientes razones: 1 retiró su consentimiento, 8 recibieron un diagnóstico final que no era de isquemia cerebral, 7 no tenían datos clínicos esenciales, 5 tenían diagnóstico previo de FA paroxística, pero presentaron un ritmo sinusal y no cumplían con el esquema de análisis, y 6 Holter ECG no eran evaluables). Cuarenta y tres (16,9%) tenían FA-adm, 211 realizaron monitoreo prolongado con ECG Holter (mediana 6.7 días, RIC 4,5–7). Veintisiete (10,6%) tuvieron una FAp nueva, 67 (26,4%) tuvieron TSVNS (> 5 latidos/24 horas). Los restantes 117 (46,1%) sin FA o TSVNS formaron el grupo control. La distribución de pacientes se muestra en el diagrama de flujo del estudio (figura 1). La visita de seguimiento final se llevó a cabo luego de una media de 3.7 años ( $\pm 5$  meses).

**Características basales.** Las características basales se muestran en la tabla 1. Aquellos con TSVNS fueron menores que aquellos con FA-adm ( $p = 0,01$ ) y aquellos con FAp ( $p = 0,18$ ). Lo mismo aplica al grupo control (controles vs FA-adm y vs FAp, cada  $p < 0,001$ ). Los pacien-

tes con TSVNS fueron mayores que los controles ( $p < 0,001$ ).

Los pacientes con FAp mostraron mayor agrandamiento/disfunción de la aurícula izquierda (índice de volumen de la aurícula izquierda aumentado [IVAI])<sup>15</sup> que aquellos con TSVNS y los controles ( $p = 0,01$  cada uno). No hubo diferencia entre aquellos con TSVNS y los controles ( $p = 1,00$ ).

De acuerdo con la clasificación de TOAST, los infartos cerebrales cardioembólicos estuvieron más presentes en los subgrupos con FA-adm y FAp que en los grupos con TSVNS o el grupo control.

**Severidad del infarto cerebral.** Los pacientes con FA-adm y FAp tuvieron puntajes del NIHSS mayores que el grupo control ( $p = 0,01$  y  $p < 0,001$ , figura 2A). No hubo una diferencia relevante entre los grupos con FA-adm y FAp ( $p = 0,39$ ). Los pacientes con TSVNS tuvieron un puntaje en el NIHSS menor que los FA-adm ( $p = 0,01$ ) y FAp ( $p < 0,001$ ), y similar al grupo control ( $p = 0,66$ ).

La subdivisión de la FAp y la TSVNS en grupos de varias duraciones (figura 2B; más detalles en los datos suplementarios) no mostró correlación entre la duración de los episodios y la severidad del infarto cerebral en el grupo FAp. No

**Tabla 1** Características basales

|                                                      | FA-adm (n = 43)  | FAP (n = 27)     | TSVNS (n = 67)   | Controles (n = 117) | Valor p |
|------------------------------------------------------|------------------|------------------|------------------|---------------------|---------|
| Edad, años                                           | 79 (74-85)       | 79 (71-85)       | 74 (66-80)       | 66 (54-73)          | < 0,001 |
| Mujeres                                              | 25 (58,1)        | 12 (44,4)        | 32 (47,8)        | 46 (39,3)           | 0,19    |
| IMC                                                  | 27,0 (24,1-30,4) | 26,0 (24,7-28,6) | 26,9 (23,7-29,7) | 27,0 (24,2-29,4)    | 0,81    |
| Presión arterial sistólica                           | 140 (126-160)    | 146 (137-170)    | 140 (130-157)    | 140 (128-151)       | 0,13    |
| Historia de infarto cerebral                         | 5 (11,6)         | 5 (18,5)         | 13 (19,4)        | 15 (12,8)           | 0,55    |
| Historia de AIT                                      | 7 (16,3)         | 2 (7,4)          | 4 (6,0)          | 11 (9,4)            | 0,38    |
| Falla cardíaca                                       | 7 (16,3)         | 2 (7,4)          | 3 (4,5)          | 6 (5,1)             | 0,09    |
| Hipertensión                                         | 34 (79,1)        | 22 (81,5)        | 52 (77,6)        | 78 (66,7)           | 0,18    |
| Diabetes mellitus                                    | 16 (37,2)        | 7 (25,9)         | 10 (14,9)        | 31 (26,5)           | 0,07    |
| Fumador activo                                       | 2 (4,7)          | 3 (11,1)         | 14 (20,9)        | 35 (29,9)           | < 0,001 |
| Ex fumador                                           | 6 (14,0)         | 2 (7,4)          | 14 (20,9)        | 21 (18,0)           |         |
| Hiperlipemia                                         | 13 (30,2)        | 14 (51,9)        | 20 (29,9)        | 36 (30,8)           | 0,17    |
| Enfermedad coronaria                                 | 9 (20,9)         | 11 (40,7)        | 10 (14,9)        | 8 (6,8)             | < 0,001 |
| Enfermedad arterial periférica                       | 1 (2,3)          | 2 (7,4)          | 1 (1,5)          | 3 (2,6)             | 0,42    |
| <b>Clasificación de infarto cerebral<sup>b</sup></b> |                  |                  |                  |                     |         |
| AIT                                                  | 12 (27,9)        | 2 (7,4)          | 32 (47,8)        | 38 (32,5)           | < 0,001 |
| Infarto cerebral menor                               | 8 (18,6)         | 6 (22,2)         | 12 (17,9)        | 34 (29,1)           |         |
| Infarto cerebral mayor                               | 23 (53,5)        | 19 (70,4)        | 23 (34,3)        | 45 (38,5)           |         |
| NIHSS (basal)                                        | 4 (3-8)          | 6 (4-10)         | 2 (1-4)          | 3 (1-4)             | < 0,001 |
| mRS (basal)                                          | 3 (2-4)          | 4 (2-4)          | 2 (1-3)          | 2 (1-3)             | 0,08    |
| <b>Clasificación TOAST</b>                           |                  |                  |                  |                     |         |
| Ateroesclerosis de grandes arterias                  | 0                | 0                | 11 (16,4)        | 18 (15,4)           | < 0,001 |
| Cardioembólico                                       | 34 (79,1)        | 9 (33,3)         | 4 (6,0)          | 13 (11,1)           |         |
| Enfermedad de pequeños vasos                         | 0                | 0                | 28 (41,8)        | 33 (28,2)           |         |
| Raro/otra causa                                      | 0                | 0                | 2 (3,0)          | 3 (2,6)             |         |
| Criptogénico                                         | 9 (20,9)         | 18 (66,7)        | 22 (32,8)        | 50 (42,7)           |         |
| IVAI <sub>max</sub> <sup>c</sup>                     | 19,3 (7,0-47,0)  | 10,0 (8,1-15,8)  | 6,4 (5,0-8,5)    | 6,1 (4,9-8,3)       | < 0,001 |
| Anticoagulación oral al alta                         | 18 (41,9)        | 4 (14,8)         | 4 (6,0)          | 4 (3,4)             | < 0,001 |

Abreviaturas: FA = fibrilación auricular; IMC = índice de masa corporal; IVAI = índice de volumen de la aurícula izquierda; mRS = escala modificada de Rankin; NIHSS = escala de infarto cerebral del NIH; SV = supraventricular; TOAST = Trial of Org 10172 in Acute Stroke Treatment.

Los valores son n (%), o mediana (rango intercuartil) para variables métricas

<sup>a</sup>Los valores *p* fueron calculados usando el test Kruskal-Wallis para todas las variables métricas y el test  $\chi^2$  o exacto de Fisher (recuento celular < 5) para variables categóricas.

<sup>b</sup>Infarto cerebral menor: síntomas resueltos o una reducción en el puntaje NIHSS por 3 en 30 días; infarto cerebral mayor: síntomas persistentes o un aumento en el puntaje NIHSS por 3 en 30 días.

<sup>c</sup>Los datos para el IVAI estuvieron disponibles en 173 casos (5 en FA-adm, 19 en FAP, 55 en TSVNS y 94 en controles). Los valores dados para FAP, TSVNS y controles pueden ser considerados representativos. Como solo teníamos datos del 11% de los pacientes en FA-adm, este valor debería ser interpretado con cautela.

hubo diferencia entre aquellos con TSVNS más largas o más cortas.

**Infartos cerebrales recurrentes, muerte y FA de inicio reciente durante el seguimiento.** Luego de una media de seguimiento de 3.7 años, el estado de supervivencia estuvo disponible para todos los pacientes. De todos los pacientes analizados, 24% (61 pacientes) habían muerto: 51,2% en el grupo FA-adm (22/43), 37,0% en el grupo FAP (10/27), 20,9% en el grupo TSVNS (14/67) y 12,8% en el grupo control (15/117). En 194 casos (76,4%), la información sobre recurrencia de infarto cerebral estaba disponible (117 fueron seguidos personalmente; en 68, se requirió información por teléfono y en los otros 9 casos, se documentó un infarto cerebral recurrente antes de que se hayan retirado o hayan muerto). Los infartos cerebrales recurrentes ocurrieron en 15,4% (30) de todos los pacientes: 29,0% en

el grupo FA-adm (9/31), 12,5% en el grupo FAP (3/24), 20,1% en el grupo TSVNS (10/48) y 8,8% en el grupo control (8/91) (*p* = 0,03) (figura 3; grupos independientes: figuras e-1 – e-3, tabla e-1). El modelo Cox de regresión múltiple mostró un riesgo aumentado de infarto cerebral recurrente para pacientes con FA (razón de riesgo [HR, *hazard ratio*] 2,637, intervalo de confianza [IC] 1,068-6,515, *p* = 0,04) y TSVNS (HR 2,742, IC 1,044-7,199, *p* = 0,04) en comparación con los controles. El subtipo de infarto cerebral (mayor vs AIT, HR 0,355, IC 0,125-1,012, *p* = 0,05) también se mantuvo en el modelo.

Aunque la mortalidad fue diferente entre los grupos, la asignación al grupo no fue independientemente predictiva de muerte en el modelo multivariable. Lo mismo aplica al punto final combinado de infarto cerebral recurrente o muerte. Ambos análisis se muestran en los datos suplementarios.

**Figura 2** Severidad del infarto cerebral

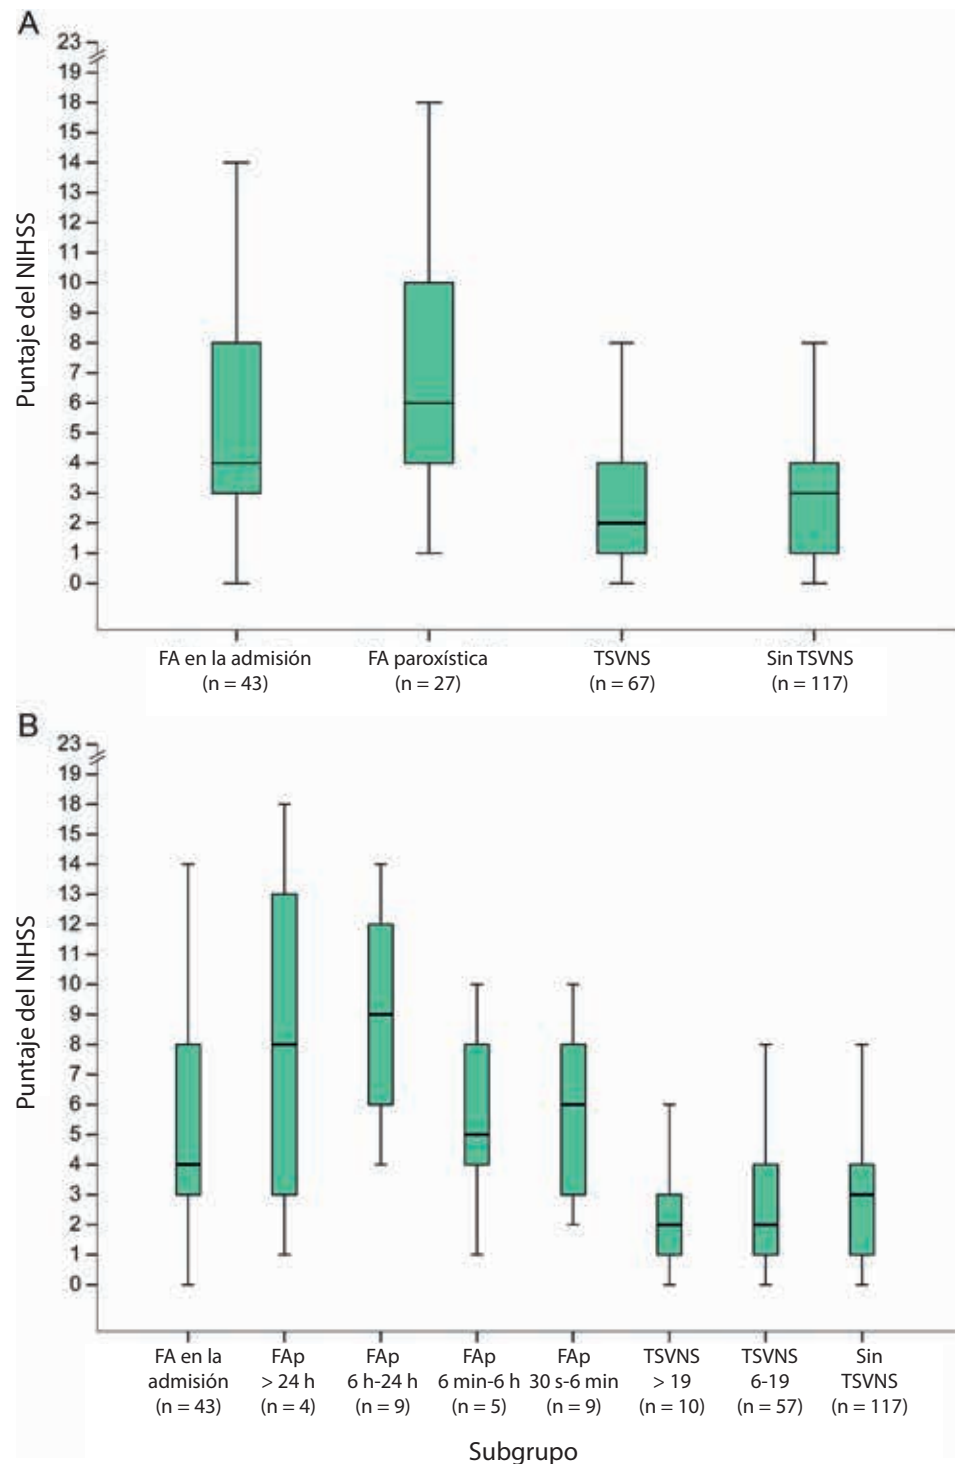

(A) Severidad del infarto cerebral (puntaje en la escala de infarto cerebral del NIH [NIHSS]) en los subgrupos formados: diagrama de caja del puntaje NIHSS en pacientes con fibrilación auricular (FA)-adm, con fibrilación auricular paroxística (FAp) en el Holter ECG de 7 días, con taquicardia supraventricular no sostenida (TSVNS) de > 5 latidos en el Holter ECG de 24 horas y sin TSVNS (controles). (B) Severidad del infarto cerebral (puntaje en el NIHSS; subgrupos con FAp y TSVNS subdivididos): diagrama de caja del puntaje NIHSS, grupo de FAp subdividido en subgrupos con episodios de FA > 24 horas, 6 horas-24 horas, 6 minutos-6 horas y 30 segundos-6 minutos; grupo con TSVNS subdividido en episodios de > 19 latidos y 6-19 latidos.

Luego de 1 año, las tasas de pacientes con antagonistas de la vitamina K (el único tipo de anticoagulación oral; los anticoagulantes orales directos todavía no se utilizaban) eran de la siguiente manera: 25/32 (78%) en el grupo con

FA-adm, 12/25 (48%) en el grupo FAp, 4/55 (7%) en el grupo TSVNS y 8/111 (7%) en el grupo control. Luego de 3 años, la tasa de anticoagulación fue 12/15 (80%) en aquellos con FA-adm, 12/14 (86%) en el grupo FAp, 3/34

**Figura 3** Infartos cerebrales recurrentes (curva de Kaplan-Meier)

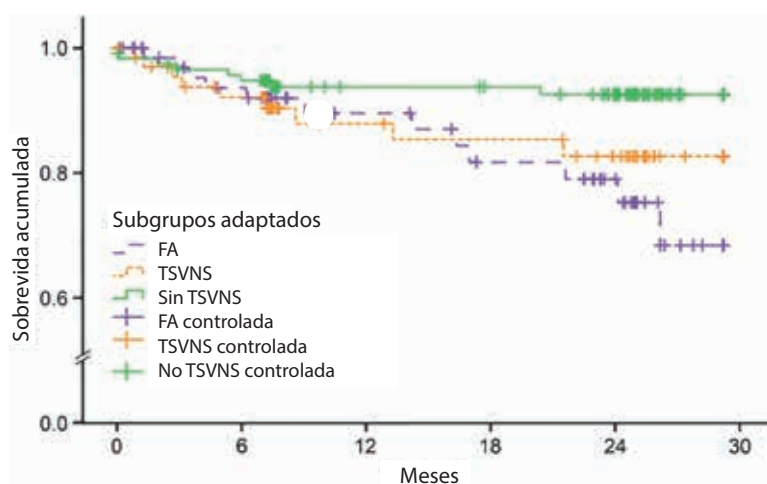

Estimador de Kaplan Meier para el punto final de infarto cerebral recurrente, grupo fibrilación auricular (FA)-adm y grupo FA paroxística combinado. TSVNS = taquicardia supraventricular no sostenida.

(9%) en el grupo TSVNS y 6/80 (8%) en el grupo control.

Catorce pacientes tuvieron una nueva FA durante el seguimiento: 8 (12%) en el grupo TSVNS y 6 (5%) en el grupo control ( $p = 0,09$ ).

**Holter ECG de 7 días repetido en pacientes con FA paroxística detectada por Holter (grupo FAp).** Ocho de los 17 pacientes que sobrevivieron en el grupo FAp (47,1%) acordaron realizar otro ECG Holter de 7 días, 5 de los cuales mostraron al menos 1 episodio de FA. Todos los episodios de FA fueron más largos que aquellos documentados en el estudio basal; 3 tenían FA persistente/permanente. Un paciente sin FA estaba recibiendo tratamiento antiarrítmico (amiodarona) luego de haber sido hospitalizado repetidamente por FA. Por lo tanto, 6 de 8 pacientes (75%) tenían signos de FA, 50% de los cuales fueron persistentes/permanentes.

**DISCUSIÓN** Nuestros principales hallazgos fueron que los pacientes con isquemia cerebral y TSVNS tienen mayor riesgo de infartos cerebrales recurrentes y mostraron numéricamente más FA nuevas durante el seguimiento que el grupo control. También descubrimos que los infartos cerebrales de pacientes con TSVNS fueron menos severos que aquellos de los pacientes con FA, comparable a lo encontrado en el grupo control. La FAp detectada por el monitoreo prolongado de ECG Holter luego de la isquemia cerebral no ocurría temporalmente, sino que en su mayoría seguía presente durante el período de seguimiento prolongado.

Un aspecto importante al discutir las variadas duraciones de la FA paroxística en pacientes con infarto cerebral es que los episodios son registrados luego de que el infarto cerebral ya ocurrió. Es

imposible decir cuál es la duración de la FA que ocurrió previa al evento, al menos que el paciente estuviese con monitoreo continuo con ECG en ese momento. Pero incluso si los pacientes están siendo monitoreados, por ej., mediante dispositivos implantados como se examinó en el ensayo ASSERT, hay importantes preguntas que siguen sin ser aclaradas: aunque la taquicardia auricular de > 6 minutos estuvo asociada con más eventos tromboembólicos en este ensayo,<sup>9</sup> los episodios observados en su mayoría no tuvieron relación temporal con la ocurrencia de los episodios de FA.<sup>10</sup> Este importante hallazgo tiene que llevar a una nueva hipótesis sobre la formación de trombos: la cardiomiopatía auricular, por ej., alteraciones estructurales como la fibrosis de la aurícula izquierda<sup>16</sup> y la dilatación podrían llevar a una reducción del flujo sanguíneo y a la formación de trombos independientemente de la ocurrencia de episodios de FA.<sup>17</sup> Por lo tanto, más allá de ser potenciales sustitutos de episodios más largos no detectados de FA, los episodios cortos de FA y la TSVNS también pueden representar marcadores de daño estructural de la aurícula izquierda. Esta hipótesis es apoyada por el hecho de que el grado de dilatación/disfunción de la aurícula izquierda (IVAI) aumenta con la duración de las TSVNS y de la FA en nuestro ensayo.

Muchos especialistas en infarto cerebral enfocan sus medidas diagnósticas y la decisión de una terapia de prevención secundaria sobre la base de la etiología más probable del evento isquémico cerebral ocurrido. Sin embargo, la etiología de un infarto cerebral recurrente difiere de la del primer evento en hasta un 50% de los casos.<sup>18</sup> Desde esta perspectiva, parece más razonable identificar todos los factores de riesgo potenciales para la recurrencia del infarto, para poder elegir más medidas diagnósticas y un enfoque terapéutico global beneficioso. Nuestros datos no pueden clarificar si la TSVNS puede directamente inducir trombos o si está asociada con un grado de disfunción auricular suficiente como para inducir material trombótico. Sin embargo, cuando usamos la severidad del infarto cerebral como sustituto de cardioembolismo, uno tendría que argumentar en contra del potencial tromboembólico de los episodios de < 30 segundos. Esto apoyaría el punto de corte de 30 segundos (arbitrariamente elegido) utilizado en las guías de FA para definir una FA clínicamente relevante.<sup>8</sup>

Por otro lado, nuestros datos claramente muestran que los pacientes con una isquemia cerebral y TSVNS tienen más infartos cerebrales recurrentes a largo plazo, que podría ser explicado por el desarrollo de FA manifiesta y alteraciones estructurales progresivas de la aurícula izquierda. Estos hallazgos están en línea con datos de una cohorte de pacientes mayores sanos,<sup>4,5</sup>

que también mostró un aumento en las tasas de infarto cerebral en pacientes con TSVNS. En nuestro ensayo, el porcentaje de pacientes que recibían anticoagulación oral en los subgrupos con y sin TSVNS fue < 10%, por lo que esto no tuvo un efecto relevante en la tasa de recurrencia de infarto cerebral. Esto quiere decir que la TSVNS tiene un valor pronóstico clínicamente relevante, independientemente de si está o no asociada con cardioembolismo. La consecuencia clínica de este hallazgo puede ser discutida controversialmente, aunque no puede ser contestada con nuestro análisis. Uno podría argumentar que los pacientes con infarto cerebral con TSVNS deberían recibir anticoagulación oral para prevenir infartos recurrentes. Sin embargo, no hay actualmente evidencia clínica para probar un beneficio de la terapia anticoagulante en esta población. Hasta que se haya probado un beneficio terapéutico, parece razonable deducir una indicación de más monitoreos con ECG para identificar pacientes con episodios manifestos de FA, que deberían ser anticoagulados.

Otro hallazgo importante de nuestro análisis fue que el 75% de aquellos inicialmente diagnosticados con FAp todavía tenían FA manifiesta luego de una media de 3.7 años, y muchos pacientes mostraron episodios prolongados o persistentes de FA. Los pacientes con FAp también tuvieron una aurícula izquierda más agrandada y disfuncional (IVAI) en comparación con otros subgrupos. Todo esto junto argumenta fuertemente en contra de la hipótesis que dice que la FAp detectada luego del infarto cerebral resulta de cambios hemodinámicos de la aurícula izquierda relacionados temporalmente por el infarto.<sup>12</sup> Nuestros hallazgos sugieren que el sustrato subyacente de la FA es la remodelación auricular crónica.<sup>19</sup> Sin embargo, sigue siendo posible que el daño del sistema nervioso autónomo o las reacciones de estrés relacionadas al infarto cerebral puedan desencadenar episodios de FA. Sin embargo, los episodios de FA progresan y persisten en el tiempo, como se ve típicamente en la FA que no está asociada a isquemia cerebral.<sup>20</sup>

A pesar de las fortalezas del estudio, que incluyen la recolección de datos prospectivos y el largo período de seguimiento, hay un número de limitaciones que deben ser tomadas en cuenta. Primero, el análisis actual fue realizado retrospectivamente. Utilizamos la discapacidad física aumentada asociada al infarto cerebral como un sustituto de los infartos cardioembólicos y no usamos las imágenes cerebrales. Las curvas de Kaplan-Meier para infartos cerebrales recurrentes en los grupos con FA y TSVNS todavía mostraban una superposición luego de unir los grupos con la FA en la admisión y la FAp. Por lo tanto, la presuposición de riesgos proporcionales no se alcanzó. Aunque ambos subgrupos fueron

enfrentados al grupo control (sin una superposición), el resultado tiene que ser interpretado con cautela.

Se necesita más investigación para estudiar la asociación de la cardiomiopatía de la aurícula izquierda y el infarto cerebral, y el rol de la TSVNS y la FAp corta. Ensayos futuros deberían evaluar si los pacientes con infarto cerebral y TSVNS se benefician del monitoreo prolongado con ECG o la anticoagulación.

Los pacientes con infarto cerebral y TSVNS tienen un riesgo aumentado de recurrencia de infarto cerebral y más frecuentemente desarrollan una FA manifiesta, lo que los hace buenos candidatos para un monitoreo prolongado con ECG. La FA detectada luego de un infarto cerebral no es un fenómeno temporal asociado al infarto.

## CONTRIBUCIONES DE LOS AUTORES

Diseño del ensayo: R.S., K.G., R.W. Análisis estadístico: A.Z., M.W.-K., R.W. Manuscrito: M.W.-K., K.G., R.W. Recolección de datos, revisión del manuscrito: todos los coautores.

## FONDOS PARA EL ESTUDIO

*Find-AF* fue apoyado por becas del German Federal Ministry of Education and Research (German Heart Failure Network, TP 7 [FKZ 01GI0205]) y una beca sin restricciones de Roche Diagnostics, Mannheim, Germany. Los que aportaron fondos no tuvieron ningún rol en el diseño del estudio, la recolección y análisis de datos, la decisión de publicación o la escritura del manuscrito.

## DECLARACIÓN DE INTERESES

M. Weber-Krüger reporta una beca para transporte de Pfizer. C. Lutz, A. Zapf, R. Stahrenberg, J. Seegers, J. Witzenhäuser, K. Wasser y G. Hasenfuß no tienen nada para declarar relevante al manuscrito. K. Gröschel reporta gastos personales y/o apoyo no financiero de Bayer, Boehringer-Ingelheim, Bristol-Myers-Squibb, Daiichi-Sankyo y Pfizer por afuera del trabajo presentado. R. Wachter reporta haber sido consultor de investigación, o haber dado charlas para Bayer, Berlin-Chemie, Bristol-Myers-Squibb, Boehringer Ingelheim, Boston Scientific, CVRx, Gilead, Johnson & Johnson, Medtronic, Novartis, Pfizer, Relaysa, Sanofi y Servier desde 2003 por fuera del trabajo presentado. Recibió becas para investigación de Boehringer Ingelheim, la European Union y el Bundesministerium für Bildung und Forschung (BMBF). Ir a [Neurology.org](http://Neurology.org) para declaraciones completas.

Recibido el 22 de enero de 2017. Aceptado en su formato final el 3 de julio de 2017.

## BIBLIOGRAFÍA

1. Lin HJ, Wolf PA, Kelly-Hayes M, et al. Stroke severity in atrial fibrillation: The Framingham Study. *Stroke* 1996;27:1760-1764.
2. Kishore A, Vail A, Majid A, et al. Detection of atrial fibrillation after ischemic stroke or transient

- ischemic attack: a systematic review and meta-analysis. *Stroke* 2014;45:520–526.
3. Sposato LA, Cipriano LE, Saposnik G, Ruiz Vargas E, Riccio PM, Hachinski V. Diagnosis of atrial fibrillation after stroke and transient ischaemic attack: a systematic review and meta-analysis. *Lancet Neurol* 2015;14:377–387.
4. Binici Z, Intzilakis T, Nielsen OW, Køber L, Sajadieh A. Excessive supraventricular ectopic activity and increased risk of atrial fibrillation and stroke. *Circulation* 2010;121:1904–1911.
5. Larsen BS, Kumarathurai P, Falkenberg J, Nielsen OW, Sajadieh A. Excessive atrial ectopy, short atrial runs increase the risk of stroke beyond Incident atrial fibrillation. *J Am Coll Cardiol* 2015;66:232–241.
6. Stahrenberg R, Weber-Krüger M, Seegers J, et al. Enhanced detection of paroxysmal atrial fibrillation by early and prolonged continuous Holter monitoring in patients with cerebral ischemia presenting in sinus rhythm. *Stroke* 2010;41:2884–2888.
7. Sposato LA, Cipriano LE, Riccio PM, Hachinski V, Saposnik G. Very short paroxysms account for more than half of the cases of atrial fibrillation detected after stroke and TIA: a systematic review and meta-analysis. *Int J Stroke* 2015;10:801–807.
8. Kirchhof P, Benussi S, Kotecha D, et al. 2016 ESC guidelines for the management of atrial fibrillation developed in collaboration with EACTS: the Task Force for the management of atrial fibrillation of the European Society of Cardiology (ESC): developed with the special contribution of the European Heart Rhythm Association (EHRA) of the ESC: endorsed by the European Stroke Organisation (ESO). *Eur Heart J* 2016;37:2893–2962.
9. Healey JS, Connolly SJ, Gold MR, et al. Subclinical atrial fibrillation and the risk of stroke. *N Engl J Med* 2012;366:120–129.
10. Brambatti M, Connolly SJ, Gold MR, et al. Temporal relationship between subclinical atrial fibrillation and embolic events. *Circulation* 2014;129:2094–2099.
11. Rankin AJ, Tran RT, Abdul-Rahim AH, Rankin AC, Lees KR. Clinically important atrial arrhythmia and stroke risk: a UK-wide online survey among stroke physicians and cardiologists. *QJM* 2014;107:895–902.
12. Abboud H, Berroir S, Labreuche J, Orjuela K, Amarenco P. Insular involvement in brain infarction increases risk for cardiac arrhythmia and death. *Ann Neurol* 2006;59:691–699.
13. Adams HP Jr, Bendixen BH, Kappelle LJ, et al. Classification of subtype of acute ischemic stroke: definitions for use in a multicenter clinical trial: TOAST: Trial of Org 10172 in Acute Stroke Treatment. *Stroke* 1993;24:35–41.
14. Weber-Krüger M, Gröschel K, Mende M, et al. Excessive supraventricular ectopic activity is indicative of paroxysmal atrial fibrillation in patients with cerebral ischemia. *PLoS One* 2013;8:e67602.
15. Stahrenberg R, Edelmann F, Haase B, et al. Transthoracic echocardiography to rule out paroxysmal atrial fibrillation as a cause of stroke or transient ischemic attack. *Stroke* 2011;42:3643–3645.
16. Marrouche NF, Wilber D, Hindricks G, et al. Association of atrial tissue fibrosis identified by delayed enhancement MRI and atrial fibrillation catheter ablation. *JAMA* 2014;311:498–506.
17. Kamel H, Okin PM, Elkind MS, Iadecola C. Atrial fibrillation and mechanisms of stroke. *Stroke* 2016;47:895–900.
18. Hillen T, Coshall C, Tilling K, Rudd AG, McGovern R, Wolfe CDA. Cause of stroke recurrence is multifactorial: patterns, risk factors, and outcomes of stroke recurrence in the South London Stroke Register. *Stroke* 2003;34:1457–1463.
19. Schotten U, Verheule S, Kirchhof P, Goette A. Pathophysiological mechanisms of atrial fibrillation: a translational appraisal. *Physiol Rev* 2011;91:265–325.
20. Kirchhof P, Auricchio A, Bax J, et al. Outcome parameters for trials in atrial fibrillation: recommendations from a consensus conference organized by the German Atrial Fibrillation Competence NETwork and the European Heart Rhythm Association. *Europace* 2007;9:1006–1023.
